# Supplementary material for: Electrochemical analysis of asymmetric supercapacitors based on BiCoO3@g-C3N4 nanocomposites
Source: Royal Society of Chemistry journal article supplement (doi:10.1039/d3dt01758c), 2023-01-01
Supplement: d3dt01758c1.pdf [file d3dt01758c1.pdf]

## **Supporting information**

### **Electrochemical Analysis of Asymmetric supercapacitor based on BiCoO<sub>3</sub>@g-C<sub>3</sub>N<sub>4</sub> Nanocomposites**

**Pandiaraja Varatharajan<sup>a</sup>, I. B. Shameem Banu<sup>a\*</sup>, Mohamad Hafiz Mamat<sup>b\*</sup>,  
Nagamalai Vasimalai<sup>c\*</sup>**

*<sup>a</sup>Department of Physics, B.S. Abdur Rahman Crescent Institute of Science & Technology,  
Vandalur, Chennai-600 048, India.*

*<sup>b</sup>NANO-ElecTronic Centre (NET), School of Electrical Engineering, College of Engineering,  
Universiti Teknologi MARA, 40450 Shah Alam, Selangor, Malaysia.*

*<sup>c</sup>Department of Chemistry, B.S. Abdur Rahman Crescent Institute of Science & Technology,  
Vandalur, Chennai-600 048, India.*

\* Corresponding Authors. E-Mail: [vasimalai@crescent.education](mailto:vasimalai@crescent.education) (Nagamalai Vasimalai)

E-Mail: [shameembanu@crescent.education](mailto:shameembanu@crescent.education) (I. B. Shameem Banu)

E-Mail: [mhmamat@uitm.edu.my](mailto:mhmamat@uitm.edu.my) (Mohamad Hafiz Mamat)

| <b>Fig. No.</b> | <b>Figure Captions</b>                                                                                                                                                                    | <b>Page No</b> |
|-----------------|-------------------------------------------------------------------------------------------------------------------------------------------------------------------------------------------|----------------|
| Figure S1       | CV curves of BiCoO <sub>3</sub> @g-C <sub>3</sub> N <sub>4</sub> for different amount of g-C <sub>3</sub> N <sub>4</sub> at the scan rate 50 mV/s.                                        | S3             |
| Figure S2       | (A) CV curves of g-C <sub>3</sub> N <sub>4</sub> with different scan rate from 5 mV/s to 50 mV/s and (B) CV curves of BiCoO <sub>3</sub> with different scan rate from 5 mV/s to 50 mV/s. | S4             |
| Figure S3       | Specific capacitance of g-C <sub>3</sub> N <sub>4</sub> , BiCoO <sub>3</sub> and BiCoO <sub>3</sub> @g-C <sub>3</sub> N <sub>4</sub> at different scan rates (from 5 mV/s to 50 mV/s).    | S5             |
| Figure S4       | (A) CV curves of BiCoO <sub>3</sub> @g-C <sub>3</sub> N <sub>4</sub> with different scan rates from 10 mV to 50 mV and (B) Corresponding linear fit curve between log(v) Vs log(i).       | S6             |
| Figure S5       | GCD curves of BiCoO <sub>3</sub> @g-C <sub>3</sub> N <sub>4</sub> for different amount of g-C <sub>3</sub> N <sub>4</sub> at the 1 A/g current density.                                   | S7             |
| Figure S6       | GCD curves of g-C <sub>3</sub> N <sub>4</sub> at different current densities (1 Ag <sup>-1</sup> to 5 Ag <sup>-1</sup> ).                                                                 | S8             |
| Figure S7       | GCD curves of BiCoO <sub>3</sub> with different current densities (1 to 5 Ag <sup>-1</sup> ).                                                                                             | S9             |
| Figure S8       | (A) Volumetric specific capacitance values of BiCoO <sub>3</sub> @g-C <sub>3</sub> N <sub>4</sub> and (B) Volumetric energy density vs power density.                                     | S10            |
| Figure S9       | (A) Specific capacitance of ASC device at current densities from 1 to 5 A/g and (B) Power densities and energy densities of ASC device.                                                   | S11            |

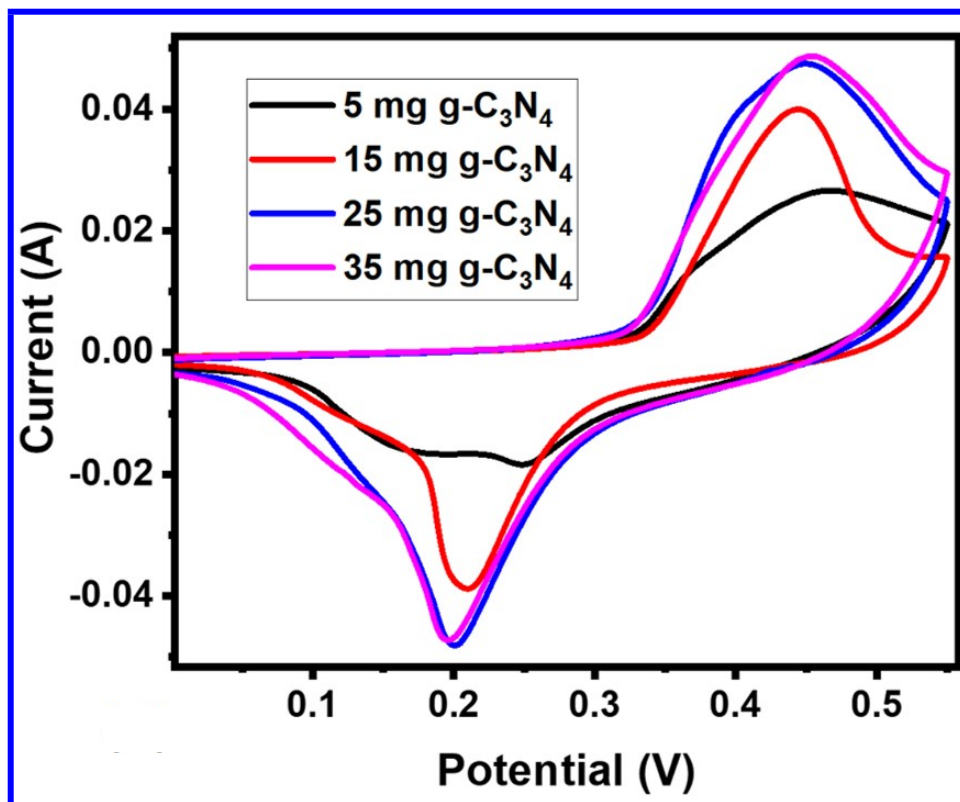

**Fig. S1.** CV curves of BiCoO<sub>3</sub>@g-C<sub>3</sub>N<sub>4</sub> for different amount of g-C<sub>3</sub>N<sub>4</sub> at the scan rate 50 mV/s and

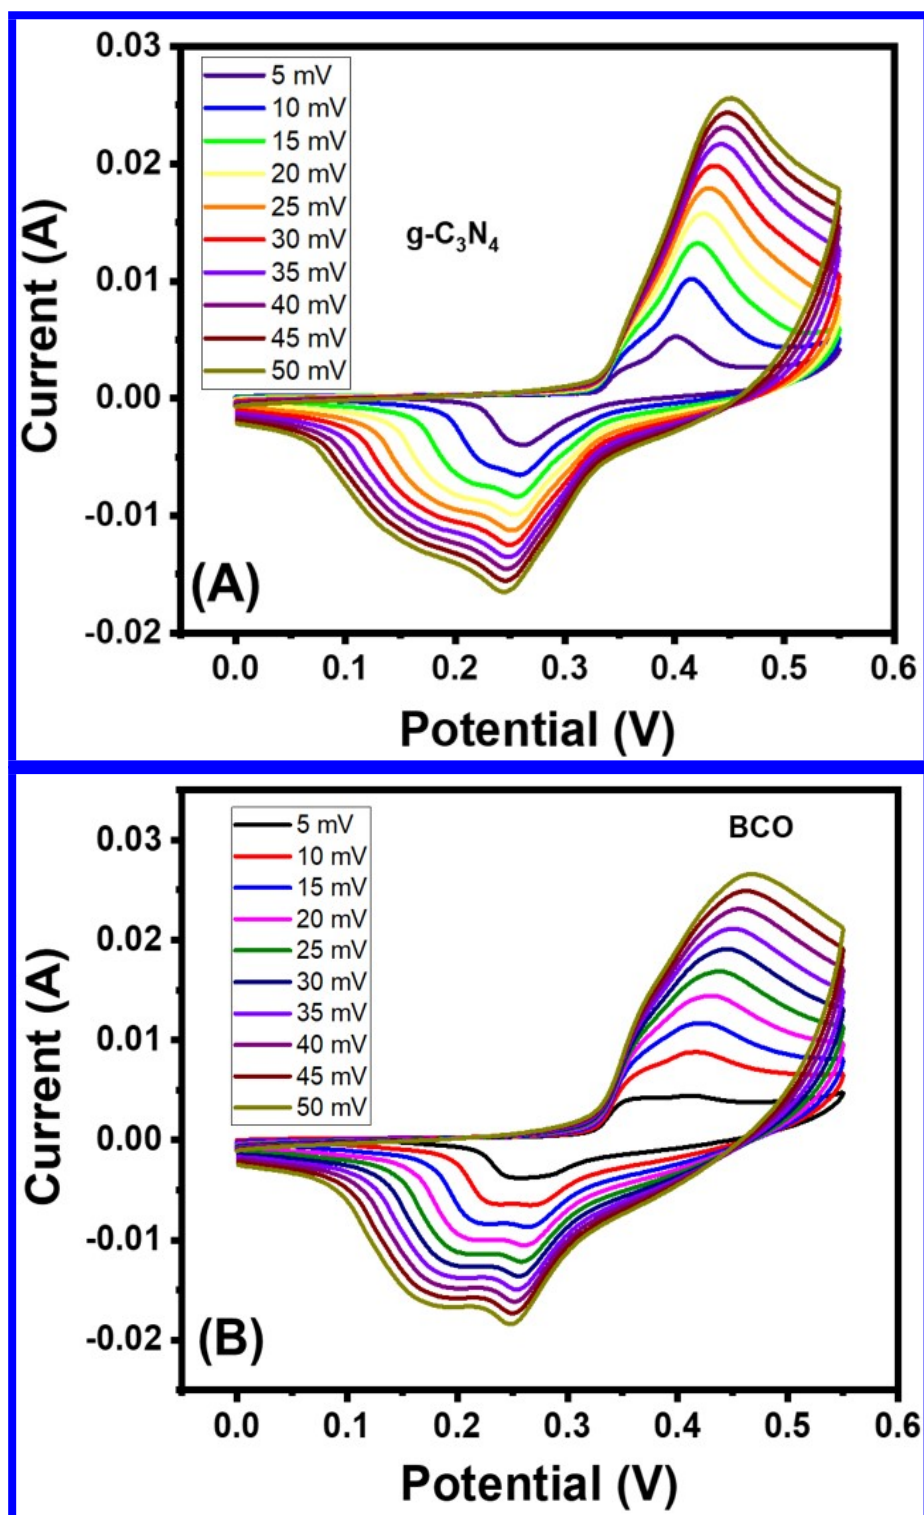

**Fig. S2.** (A) CV curves of g-C<sub>3</sub>N<sub>4</sub> with different scan rate from 5 mV/s to 50 mV/s and (B) CV curves of BiCoO<sub>3</sub> with different scan rate from 5 mV/s to 50 mV/s.

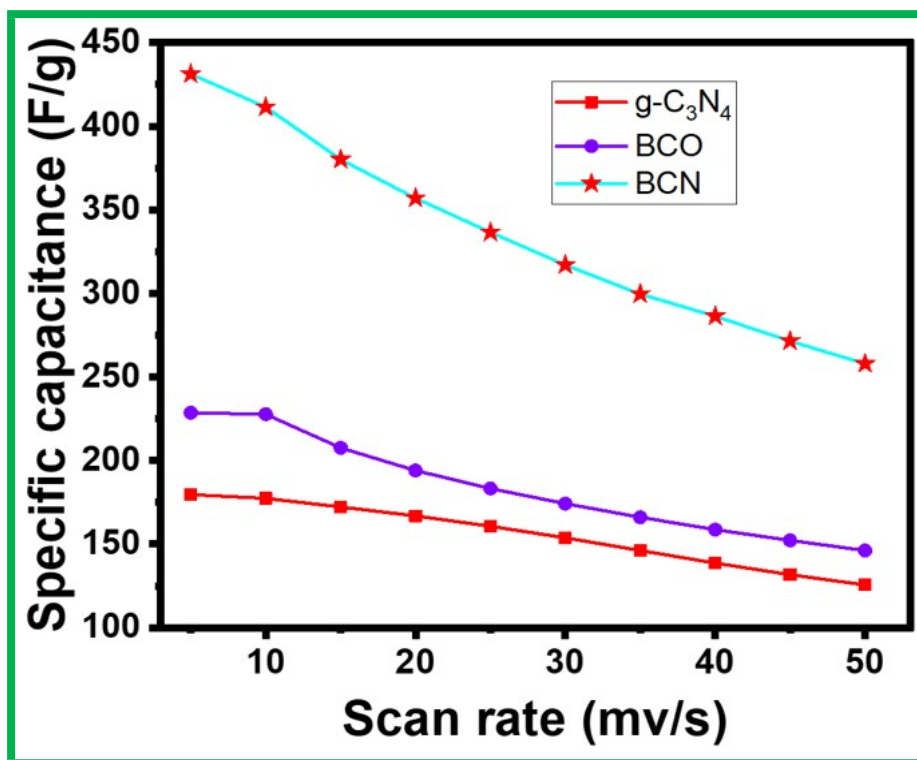

**Fig. S3.** Specific capacitance of g-C<sub>3</sub>N<sub>4</sub>, BiCoO<sub>3</sub> and BiCoO<sub>3</sub>@g-C<sub>3</sub>N<sub>4</sub> at different scan rates (from 5 mV/s to 50 mV/s).

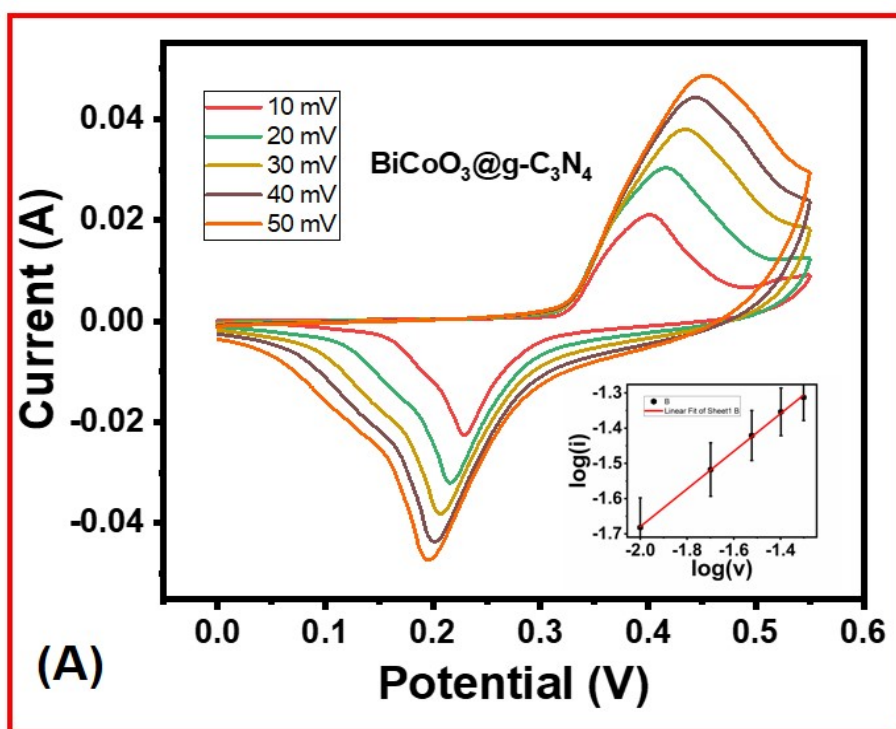

**Fig. S4.** (A) CV curves of BiCoO<sub>3</sub>@g-C<sub>3</sub>N<sub>4</sub> with different scan rates from 10 mV to 50 mV and (B) Corresponding linear fit curve between log(v) Vs log(i).

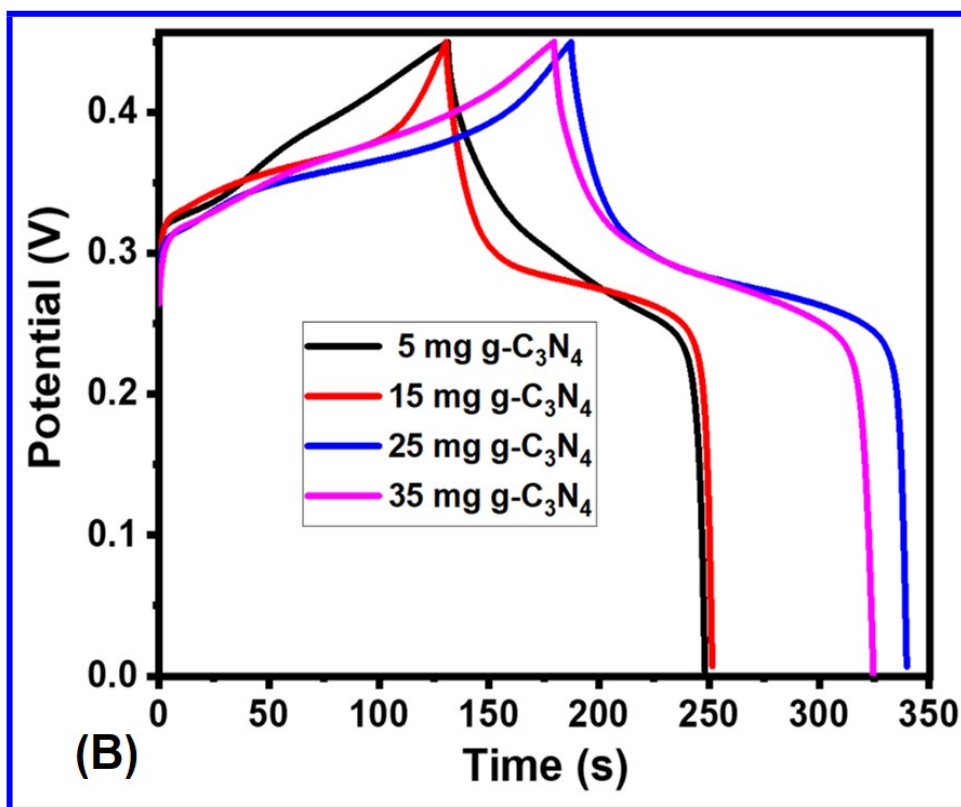

**Fig. S5.** GCD curves of BiCoO<sub>3</sub>@g-C<sub>3</sub>N<sub>4</sub> for different amount of g-C<sub>3</sub>N<sub>4</sub> at the 1 A/g current density.

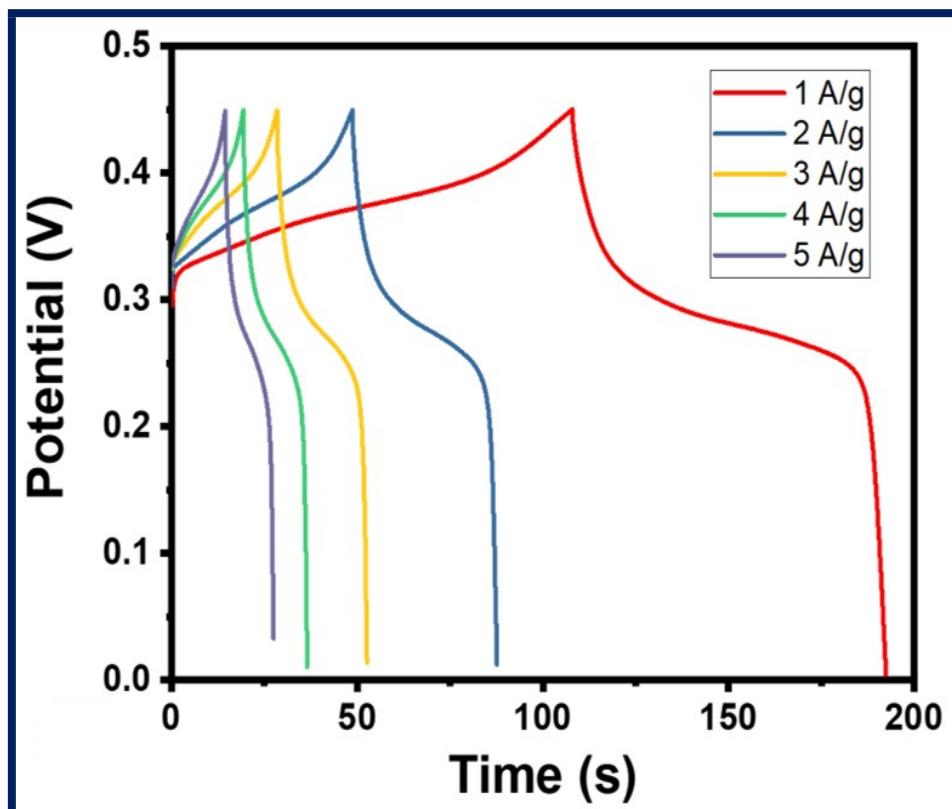

**Fig. S6.** GCD curves of g-C<sub>3</sub>N<sub>4</sub> at different current densities (1 Ag<sup>-1</sup> to 5 Ag<sup>-1</sup>).



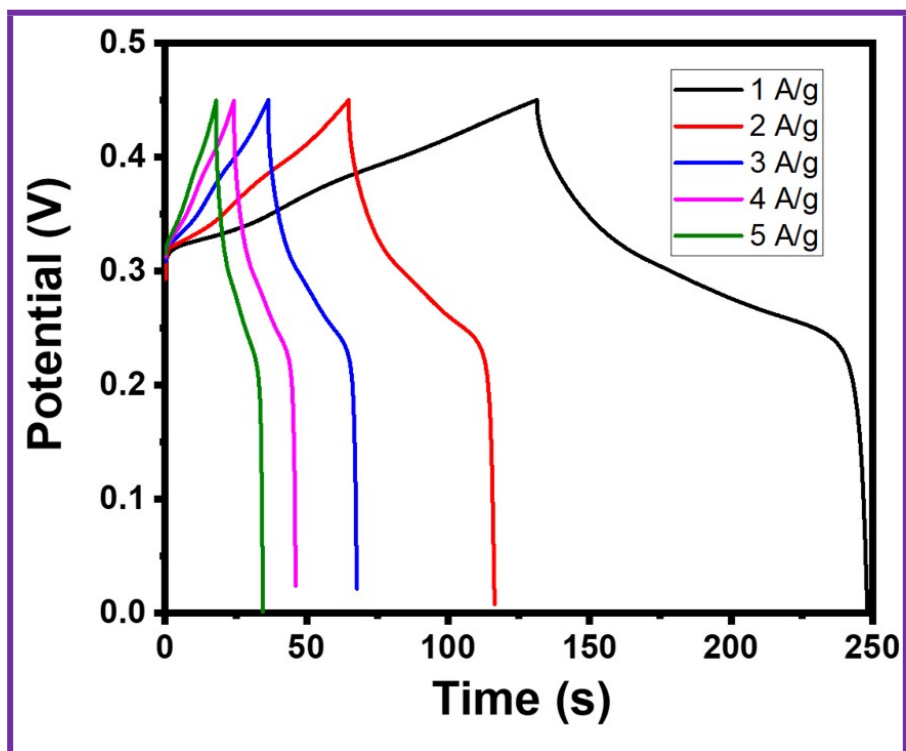

**Fig. S7.** GCD curves of BiCoO<sub>3</sub> with different current densities (1 to 5 A/g).

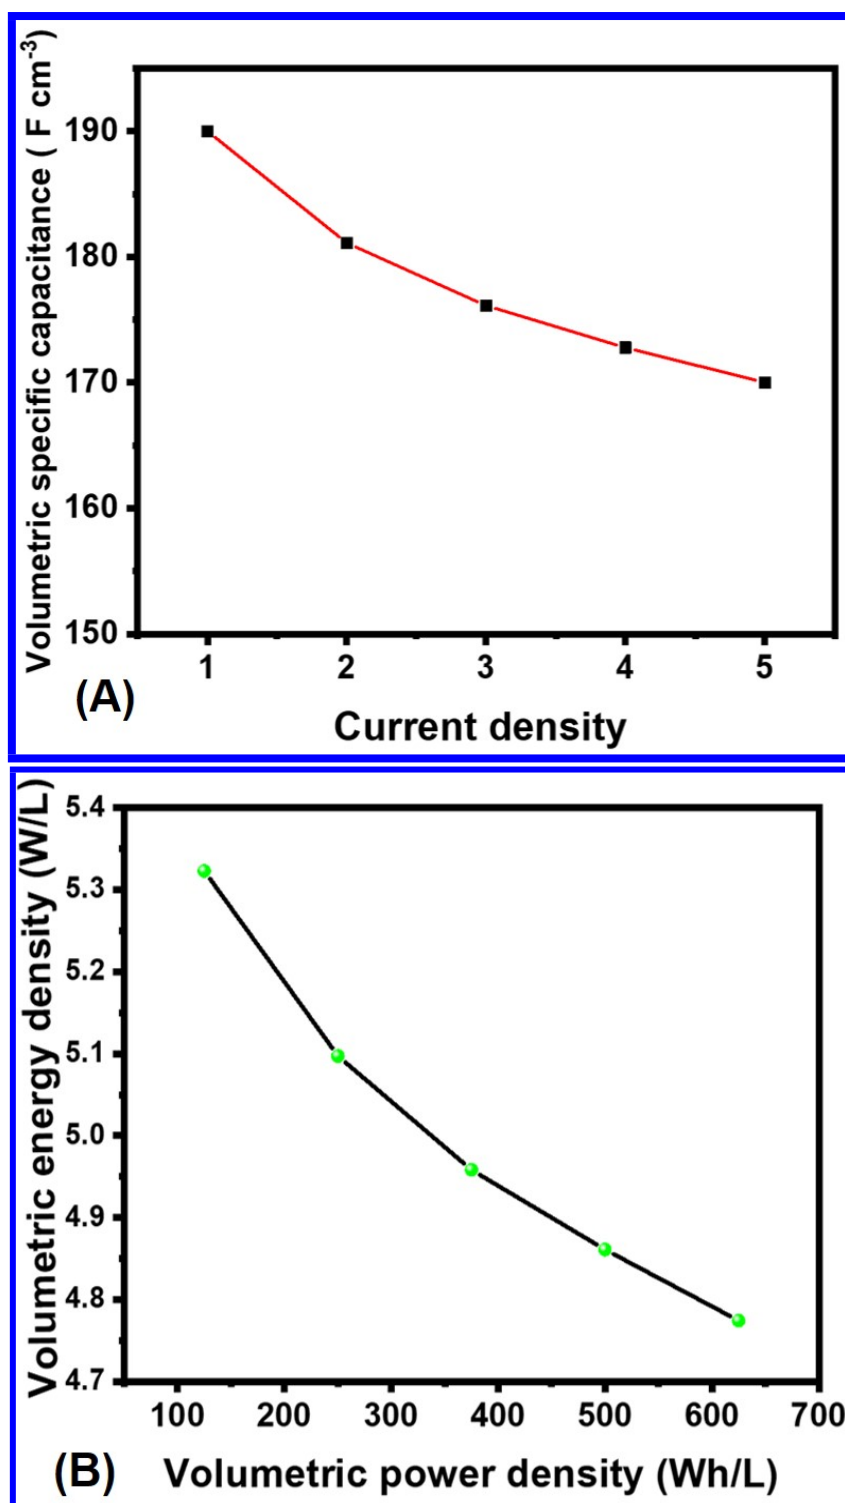

**Fig. S8.** (A) Volumetric specific capacitance values of  $\text{BiCoO}_3@g\text{-C}_3\text{N}_4$  and (B) Volumetric energy density vs power density.

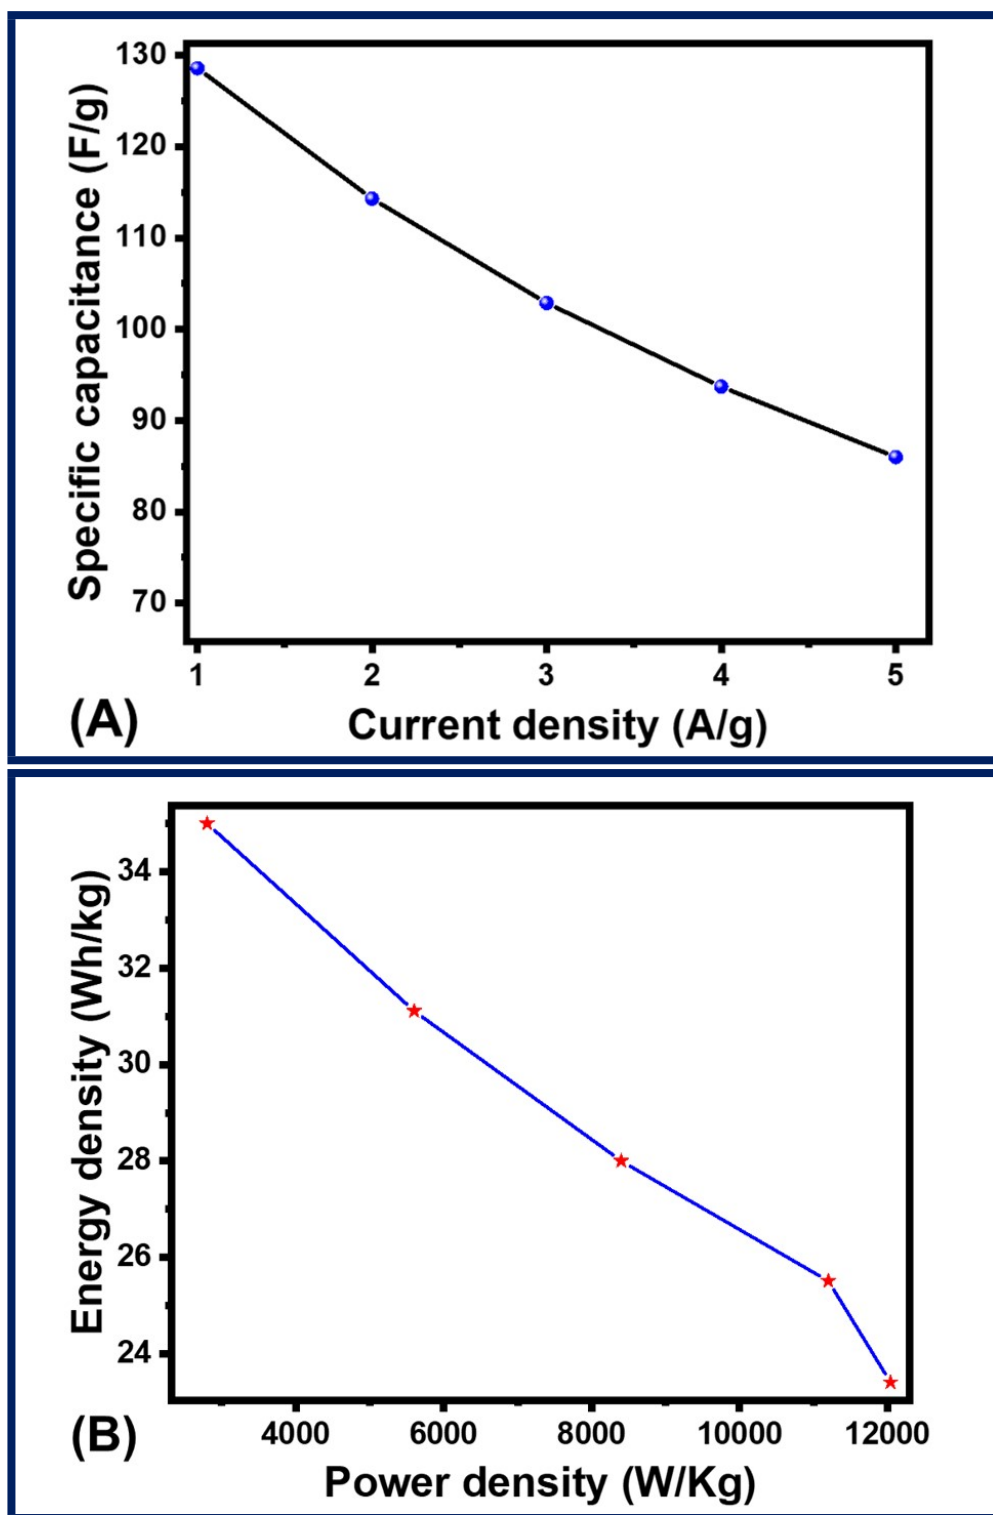

**Fig. S9.** (A) Specific capacitance of ASC device at current densities from 1 to 5 A/g and (B) Power densities and energy densities of ASC device.
